# 1 TuNR: Orthogonal Control of Mean and Variability of 2 Endogenous Genes in a Human Cell Line

3 Alain R. Bonny<sup>1,3</sup>, João Pedro Fonseca<sup>1,3,4</sup>, Jesslyn E. Park<sup>1</sup>, Hana El-Samad<sup>1,2\*</sup>

4 <sup>1</sup>Department of Biochemistry and Biophysics, University of California, San Francisco, San  
5 Francisco, CA 94158

6 <sup>2</sup>Chan Zuckerberg Biohub, San Francisco, CA 94158

7 <sup>3</sup>Contributed Equally

8 <sup>4</sup>Present address: Amryis Bio Products Portugal, Porto, Portugal

9 \*To whom correspondence should be addressed: [Hana.El-Samad@ucsf.edu](mailto:Hana.El-Samad@ucsf.edu)

## 10 Abstract

11 Stochastic fluctuations at the transcriptional level contribute to isogenic cell-to-cell  
12 heterogeneity in mammalian cell populations. However, we still have no clear understanding of  
13 the repercussions of this heterogeneity, given the lack of tools to independently control mean  
14 expression and variability of a gene. Here, we engineered a synthetic circuit to independently  
15 modulate mean expression and heterogeneity of transgenes and endogenous human genes.

16 The circuit, a Tunable Noise Rheostat (TuNR), consists of a transcriptional cascade of two  
17 inducible transcriptional activators, where the output mean and variance can be modulated by  
18 two orthogonal small molecule inputs. In this fashion, different combinations of the inputs can  
19 achieve the same mean but with different population variability. With TuNR, we achieve low  
20 basal expression, over 1000-fold expression of a transgene product, and up to 7-fold induction  
21 of the endogenous gene *NGFR*. Importantly, for the same mean expression level, we are able to  
22 establish varying degrees of heterogeneity in expression within an isogenic population, thereby  
23 decoupling gene expression noise from its mean. TuNR is therefore a modular tool that can be  
24 used in mammalian cells to enable direct interrogation of the implications of cell-to-cell  
25 variability.

## 26 Introduction

27 Clonal cells within a population can display tremendous variability in their physical  
28 characteristics (e.g. morphology), their molecular contents, as well as their transcriptional and  
29 signaling states, leading to distinct phenotypes and cell fate decisions in response to the same  
30 stimulus<sup>1-6</sup>. The roots of this cell-to-cell variability within a population are many, including distinct  
31 microenvironments or paracrine signaling<sup>7</sup>. However, a main driver of population heterogeneity  
32 is at the level of transcription<sup>8,9,10</sup>. While certain “housekeeping” genes (e.g. ribosome  
33 biogenesis) can display remarkably uniform expression between cells, other genes can exhibit  
34 widely heterogeneous expression<sup>11</sup>. Uncovering how transcriptional fluctuations differentially  
35 direct downstream network activities to cause divergent behaviors from the average of the  
36 population has been a long-standing research effort<sup>12,13</sup>. In unicellular organisms, cell-to-cell  
37 variability in gene expression has been shown to confer survival under extreme duress in a  
38 phenomenon known as bet-hedging<sup>14,15</sup>. Bet-hedging in microbial populations is one example

39 where variable transcriptional activity can drive phenotypic behaviors, which has been  
40 implicated in antibiotic resistance<sup>16–18</sup>. In multicellular organisms, transcriptional heterogeneity  
41 has been observed to at least partially influence cell fate decisions such as stem cell  
42 differentiation<sup>13</sup>, the HIV latent-active decision<sup>19</sup>, and drug resistance upon selection<sup>20,21</sup>.

43         While numerous observations implicating gene expression heterogeneity in differential  
44 phenotypes have been documented, determining the causal effect of this variability can only be  
45 done when it is the only experimental variable that is changed in a study. This has proven to be  
46 challenging because genetic manipulations that change variability, for example through the  
47 suppression or over-expression of a gene, also change mean gene expression. Interrogating  
48 hypotheses about variability therefore awaits strategies that can deconvolve the effects of  
49 changes in the mean expression of a gene from its variability. A synthetic biology approach is  
50 uniquely suited to address this challenge<sup>20,22–27</sup>, as shown through the use of optogenetic  
51 pulsing<sup>28</sup>, negative and positive feedback<sup>20</sup>, as well as titratable, independent production and  
52 degradation of a protein of interest<sup>29,30,31</sup>. While presenting valuable proofs of concepts, these  
53 strategies remain challenging to deploy for biological studies in mammalian systems. For  
54 example, the optogenetic pulsing strategy allows for the same circuit to overexpress and  
55 independently modulate gene variability in response to different inputs of blue light. However,  
56 this strategy has only been vetted for transgene regulation in *Saccharomyces cerevisiae*, with  
57 non-trivial barriers to implementation in mammalian systems. The strategy relying on the use of  
58 negative and positive feedback to regulate the mean and heterogeneity in gene expression  
59 requires different genetic circuits and cell lines in order to achieve similar means with different  
60 variances, representing a cell engineering challenge. Lastly, while controlling protein production  
61 independent of its degradation is an elegant implementation to modulate mean and variability,  
62 this circuit relies on inserting a transgene and appending a destabilizing domain to the protein of

63 interest, potentially perturbing its endogenous function. Additionally, modifying endogenous loci  
64 with the destabilization domain is not modular, nor does it allow for high-throughput testing of  
65 different genes. While each of the aforementioned studies has advanced our understanding, a  
66 strategy that is amenable to a wide range of mammalian expression systems, is modular to  
67 target transgene and endogenous loci, and can decouple changes in mean from variance, is still  
68 needed.

69         To address this challenge, we looked to an earlier synthetic circuit that utilized a serial  
70 orientation of independent inducible transcription factors to decouple mean expression from  
71 variability<sup>32</sup>. We engineered an analogous small molecule dual-inducible synthetic circuit in  
72 human cells, which we named a Tunable Noise Rheostat (TuNR), to independently titrate the  
73 mean expression and variability of transgene and endogenous gene products in a mammalian  
74 cell line (PC9). This cascading-activator circuit arrangement achieved approximately 1000-fold  
75 induction of transgene expression. Furthermore, different dosage regimes of the two small  
76 molecules could achieve the same mean gene expression (isomeans) with different variability  
77 within a population. As a proof of concept, we deployed TuNR to the endogenous loci of genes  
78 *NGFR* and *CXCR4*. Used in this endogenous context, the circuit can induce expression up to  
79 7.2-fold for *NGFR* and 3.4-fold for *CXCR4*. In both cases, however, we could achieve isomean  
80 combinations of inducers where TuNR can modulate the variability of *NGFR* and *CXCR4*  
81 expression independent of their means. These data position TuNR as a modular circuit that  
82 allows protein mean expression and variability control, enabling systematic explorations of the  
83 specific consequences of mean expression of a gene versus its variability in mammalian cells.

## 84 Results

## 85 **Construction and validation of a serial circuit topology consisting of two inducible** 86 **transcriptional activation systems**

87         We built TuNR as a serial connection of two inducible transcriptional activation systems,  
88 where the upstream system (first node) controls production of the downstream system (second  
89 node) (Figure 1A, Supplemental Figure 1A). The first node consists of a Gal4 DNA binding  
90 domain fused to half of a split abscisic acid (ABA) binding domain that, in the presence of ABA,  
91 assembles with its cognate heterodimer fused to a VP-16 activation domain<sup>33,34</sup>. The recruitment  
92 of the ABA-reconstituted gene product of the first node to the Upstream Activating Sequence  
93 minimal promoter (pUAS) drives the expression of the second inducible system and mRuby as a  
94 reporter. This second node consists of a *Staphylococcus Pyogenes* nuclease-dead Cas9  
95 (dCas9) N-terminally fused to half of a gibberellic acid (GA) binding domain and a VPR (p65,  
96 VP65, Rta) activation domain appended to the other half of the GA binding domain. In the  
97 presence of GA, these two proteins dimerize, and upon the concomitant expression of a target  
98 guide RNA (gRNA), are able to induce expression of the gene of interest (Figure 1A). We  
99 identified ABA and GA as small molecule inducers of choice due to their low impact on  
100 mammalian physiology, reversibility of cognate protein dimerization, and the orthogonality of  
101 each heterodimerization event<sup>34,35,33</sup>. Moreover, we chose dCas9 as the final node of TuNR for  
102 its modularity in targeting any locus with an appropriate protospacer adjacent motif.

103         We integrated TuNR together with a gRNA cassette targeting the Tetracycline Response  
104 Element (pTRE) and a pTRE-driven mAzamiGreen reporter in PC9 cells (Figure 1A). In order to  
105 limit confounding effects of random integration of the circuit, we isolated and propagated cell  
106 lines from single cell clones. To characterize the steady-state expression of the first node of the  
107 circuit, we induced expression with varying concentrations of ABA and measured mRuby  
108 expression daily over 7 days, replenishing the induction media every 24 hours. We observed

109 graded mRuby activation at all doses with each reaching steady state by day 3 and maintaining  
110 their respective mRuby expression for the remainder of the experiment (Figure 1B,  
111 Supplementary Figure 1B). Next, we characterized expression of the second node in a separate  
112 experiment by maximally priming cells with 400  $\mu$ M ABA for 3 days and then titrating the amount  
113 of GA. Similar to the first node characterization, we measured mAzamiGreen expression and  
114 replenished media every 24 hours over 7 days. As expected, we observed proportional  
115 induction of the second inducible node, as mAzamiGreen levels reached steady state by day 6  
116 for all dosages (Figure 1C). In each of these experiments, we observed an approximately  
117 100-fold induction for each respective node, consistent with previous reports<sup>33</sup>. Cells that were  
118 not exposed to either ABA or GA had nearly 10-fold lower mAzamiGreen expression than  
119 ABA-primed cells due to the lack of basal dimerization from the split GA recruitment domains  
120 (Supplementary Figure 1C). Importantly, induction of TuNR with ABA and GA showed that  
121 mRuby expression, which reports on the activity of the first node, responds uniquely to ABA,  
122 and not to GA, confirming that these two small molecules have little cross-reactivity  
123 (Supplemental Figure 1D).

124 To explore a more comprehensive range of expression for mAzamiGreen in response to  
125 simultaneous ABA and GA induction, we primed the cells with a dose response of ABA for 3  
126 days and, while continuing ABA induction, titrated induction with GA and measured the  
127 expression of mAzamiGreen (Figure 1D). As expected, the absence of both ABA and GA (top  
128 left corner) set the basal expression of mAzamiGreen with the lowest amount possible from  
129 TuNR. As an illustration of the benefit of the cascade transcriptional activator arrangement,  
130 without ABA, we detected little change in terminal node activation in response to increasing GA  
131 (top row, Figure 1D). Conversely, in the absence of GA, TuNR displays 6-fold induction upon  
132 addition of ABA, consistent with earlier experiments suggesting that leakiness emerges from the

133 accumulation of the first node activator (first column, Figure 1D). When both small molecules  
134 are present, TuNR induces expression more than either small molecule alone, reaching a  
135 maximum mAzamiGreen expression of approximately 1000-fold when both inducers are at their  
136 highest concentration. Notably, a transcriptional activator circuit mediated by GA (rows of Figure  
137 1D), achieves approximately 100-fold induction. As the concentration of ABA increases, so does  
138 the basal expression. This reflects a tradeoff between maximum expression and basal leakiness  
139 (Figure 1D, E). The serial arrangement of the transcriptional activators attenuates this basal  
140 leakiness, while achieving a superior maximum fold-change induction when compared to a  
141 single-node circuit.

142 Inducible gene expression systems both in microorganisms<sup>36,37,38</sup> and mammalian  
143 cells<sup>34,35,39,40</sup> have historically suffered from leaky basal expression in the absence of inducer.  
144 Our data indicate that the serial topology of TuNR, through the combination of  
145 chemically-inducible orthogonal recruitment domains, was able to generate a two-input and  
146 one-output system with low basal activity with a smooth continuum of expression values.  
147 Intuitively, the cascade structure is acting as a coincidence detector in which the output relies on  
148 the unlikely simultaneous activation of two transcriptional activators under basal conditions (no  
149 small molecule inputs), therefore mediating a low basal activity. However, upon induction with  
150 both small molecule activators, output expression is enabled, and can be precisely controlled by  
151 titrating both independent inputs. We next set out to investigate whether cell-to-cell variability  
152 might also be modulated in this circuit topology through different combinations of the small  
153 molecule inputs.

154 **Serial topology of TuNR enables independent control of transgene mean expression and**  
155 **noise**

156 The topology of the TuNR circuit has been shown to allow for the independent control of  
157 the mean and variance of the expression of transgenes in yeast<sup>29,32</sup>. To explore the ability of  
158 TuNR to control population heterogeneity in the expression of a transgene of interest in  
159 mammalian cells, we generated a clonal PC9 cell line that has two identical pTRE promoters  
160 that are targeted by the second node and independently drive the expression of both  
161 mAzamiGreen and tagBFP (Figure 2A). We induced TuNR with a two-dimensional  
162 dose-response of ABA and GA as previously described, and measured mAzamiGreen and  
163 tagBFP expression at steady state. Induction of TuNR with ABA and GA showed similar effects  
164 on the mean expression of mAzamiGreen and tagBFP, with both fluorescent proteins displaying  
165 correlated, increasing expression with both inducers (Supplementary Figure 2).

166 In order to quantify the total noise for every combination of ABA and GA, we utilized a  
167 common noise decomposition strategy to ascertain the extrinsic and intrinsic contributions to the  
168 expression noise as shown previously<sup>8</sup>. In this analysis, the correlated expression between the  
169 two terminal fluorophores represents the extrinsic noise, or cell-to-cell variability; whereas the  
170 uncorrelated expression is the intrinsic noise, or the cumulative intracellular stochastic effects  
171 (Figure 2B, Supplementary Figure 3)<sup>41</sup>. Based on prior studies, we hypothesized that due to the  
172 serial topology of TuNR, different combinations of ABA and GA could achieve the same mean  
173 expression, but with different extrinsic noise values. To quantify the noise in the system we used  
174 the coefficient of variation ( $CV^2$ ). Consistent with the notion that stochastic effects due to  
175 counting noise diminish with increasing mean, we observed a strong anti-correlated relationship  
176 between intrinsic noise and mean expression (Figure 2C). Contrary to the intrinsic noise trend,  
177 we observed that extrinsic noise was less dependent on increasing mean, where different  
178 combinations of ABA and GA achieved the same mean with different extrinsic noise values  
179 (Figure 2C). We further investigated these “isomean” distributions, and a common pattern



180 emerged: cells exposed to the lower amount of ABA and higher amount of GA had wider  
181 histogram distributions, suggestive of more cell-to-cell variability, than cells exposed to high  
182 amounts of ABA and lower of GA (Figure 2D, Supplemental Figure 4). The multiplier effect  
183 between serially-arranged transcriptional activators, which has been previously demonstrated to  
184 achieve noise modulation, maintains its efficacy in this more complex eukaryotic system<sup>10,32</sup>.  
185 This observation was consistent across both terminal fluorophores, and another clonal cell line  
186 of the circuit that likely has a different number of circuit integrations, suggesting that the circuit  
187 topology of TuNR is driving this behavior (Supplemental Figure 5). To visualize the  
188 heterogeneity, we imaged the mRuby and mAzamiGreen expression in two representative  
189 isomean wells (Figure 2E). Images of these cells further reinforce that a high concentration of  
190 ABA (high expression of mRuby) combined with low concentration of GA gives rise to a tighter  
191 distribution that displays a more uniform, average mAzamiGreen expression among cells.  
192 Conversely, a lower concentration of ABA (low expression of mRuby) with higher amounts of  
193 GA lead to wider distributions and the presence of both low- and high-expressing mAzamiGreen  
194 cells (Figure 2E). These data establish TuNR as a synthetic circuit that can be deployed to  
195 decouple mean expression and the extrinsic noise of a transgene of interest.

## 196 **TuNR enables independent control of population mean and variance of endogenous** 197 **genes**

198         Given the capabilities of dCas9, we next attempted to challenge TuNR by testing its  
199 efficacy and modularity against endogenous loci. We chose the genes *NGFR* and *CXCR4* for  
200 the first proof of concept because their encoded proteins are both membrane-bound, and could  
201 be stained at the surface of live cells with commercial antibodies. Additionally, *NGFR* and  
202 *CXCR4* have been previously implicated as proliferative and metastatic oncogenes,

203 respectively<sup>21,42</sup>. These two genes represent distinct expression paradigms to assess  
204 independent mean and variability control: *NGFR*, which is not expressed in PC9 cells<sup>21</sup>; and  
205 *CXCR4*, which is constitutively transcribed by the parental cell line<sup>43</sup>. By targeting *NGFR*, we  
206 sought to test the extent of control in a gene absent active transcriptional machinery at its locus.  
207 In the case of *CXCR4*, due to its native constitutive expression, TuNR would compete with  
208 endogenous transcriptional and translational machinery in regulating protein abundance.

209         To target the circuit to endogenous loci in a modular fashion, we built a modified TuNR  
210 “chassis” clonal cell line without a gRNA cassette, and confirmed that the first node of the circuit  
211 reached steady state with comparable kinetics to the original TuNR (Supplementary Figure 6A,  
212 B). We transduced the cells with lentivirus carrying previously-vetted gRNAs that target either  
213 the *NGFR* (Figure 3A) or *CXCR4* (Figure 3B) promoters with a tagBFP reporter indicative of  
214 integration<sup>44</sup>. We then induced cells with ABA and GA at varying concentrations, reproducing  
215 the two-dimensional dose response matrix described earlier, and measured protein levels of  
216 *NGFR* and *CXCR4* (Supplemental Figure 6C, D).

217         TuNR achieved 7.2-fold mean induction for *NGFR* and 3.4-fold induction for *CXCR4* and  
218 (Figure 3C, D), which are levels comparable to what other systems have achieved with  
219 CRISPRa<sup>45,46</sup>. Additionally, as observed in modulating mAzamiGreen, TuNR showed a negligible  
220 effect on basal levels of *NGFR* and *CXCR4* (Figure 3C, D), demonstrating that TuNR minimally  
221 perturbs basal gene expression due to its serial topology .

222         Furthermore, distributions of protein abundance at different levels of ABA and GA  
223 induction showed a nearly three- and two-fold range of tunable extrinsic noise for *NGFR* and  
224 *CXCR4*, respectively (Figure 3E, F). Here again, when comparing distributions with the same  
225 mean for both *NGFR* (Figure 3G, I) and *CXCR4* (Figure 3H, J) we found that low ABA and high  
226 GA gave rise to wider distributions, while high ABA and low GA reproducibly gave rise to

227 narrower distributions of expression in the cell populations (Supplementary Figure 7). These  
228 results illustrate that TuNR is able to precisely and orthogonally control select genes from their  
229 endogenous loci and produce cellular populations with distinct means and variances in a  
230 manner consistent with transgene regulation.

## 231 Discussion

232 Advances in synthetic biology have enabled novel investigations into fundamental  
233 aspects of biology and ushered in a sea change in biotechnology and bioengineering. The main  
234 driver of this paradigm shift is the development of new and more precise tools that are modular,  
235 robust, and open new lines of questioning. Despite enhancements in the suite of tools available  
236 for mammalian gene regulation, the ability to finely control the mean and variability of gene  
237 expression has long-been outstanding, and previous efforts in mammalian expression systems  
238 have often convolved these two parameters. To address this need, we developed TuNR, which  
239 acts as a versatile and modular tool to effectively decouple control of the mean from the  
240 variance in gene expression. To accomplish this, we arranged two orthogonal, inducible  
241 expression systems serially so that by tuning the concentrations of each respective inducer, we  
242 can achieve combinations with the same mean expression, yet different extrinsic noise  
243 properties for targeted genes of interest. From this topology, we demonstrated a dynamic range  
244 of nearly 1000-fold inducible transgene expression while reducing basal leakiness 10-fold when  
245 compared to a single-node circuit. In addition to this precise control over the mean, this circuit  
246 topology enables independent control over the population variability. With the inherent versatility  
247 of CRISPR technology, developing a chassis TuNR allows multiple genes to be investigated in  
248 parallel. To that end, the precise control of gene expression mean and variability was not limited  
249 to transgenes, and extended to endogenous loci.

250 We believe the main contribution of TuNR is in its ability to be a multifaceted tool  
251 towards precise gene regulation. While the induction capabilities of TuNR and other comparable  
252 CRISPRa-based systems in activating endogenous gene expression is modest relative to  
253 transgenes, we argue that precisely regulating the distribution of gene expression will be of  
254 tremendous value in future investigations. It is likely that our ability to achieve small fold  
255 changes for endogenous genes compared to transgene is related to a lack of clear  
256 understanding of enhancer-promoter mechanisms and corrective cellular mechanisms that  
257 counteract the action of the synthetic circuit. Understanding these effects will enable synthetic  
258 circuits to more robustly drive endogenous gene production. However, as much has been  
259 learned upon the adoption of titratable expression systems versus unregulated overexpression,  
260 we anticipate that granular control over the shape of a gene expression distribution will make  
261 similar contributions to the field. Furthermore, since it is well established that genes rarely  
262 operate in isolation, by modifying the gRNA cassette, one can conceivably multiplex target  
263 modulation in the same controlled manner. By establishing the TuNR cascade topology as a  
264 tractable and versatile system in mammalian cells, it would be interesting to attach different  
265 effector domains to the second node to further probe the effects of noisy gene perturbations, not  
266 limited to CRISPRa.

267 The work presented here opens new avenues to precisely interrogate one of the most  
268 fundamental aspects of biological systems: cell-to-cell variability. TuNR is a powerful new tool  
269 that will enable genetic perturbations with precise control, and thus allow for future studies to  
270 answer expression variability- and magnitude-dependent questions.

## 271 Main Figure Captions

272 **Figure 1: TuNR reduces basal leakiness, amplifies fold change, and expands accessible**  
273 **dynamic range relative to single inducible activator for transgene expression.** a) Diagram  
274 of TuNR circuit composed of a constitutively expressed Abscisic Acid (ABA)-inducible split  
275 system consisting of Gal4 and VP16. This inducible system drives the expression of mRuby as  
276 a reporter and a Gibberellic Acid (GA)-induced split system consisting of dCas9 and VPR.  
277 Addition of GA and constitutive expression of the guide RNA (gRNA, not pictured) targeted to  
278 the Tetracycline Responsive Element (pTRE) drives mAzamiGreen expression. b) Expression of  
279 mRuby from TuNR induced with increasing concentrations of ABA over 7 days. Media was  
280 replenished every 24 hours. c) Time-dependent mAzamiGreen expression. Cells were first  
281 induced with 400  $\mu\text{M}$  of ABA for 3 days, at which increasing concentrations of GA were added.  
282 Measurements were carried out over the following 7 days while keeping ABA and GA  
283 concentration constant through daily replenishment. d) Heatmap of steady-state mAzamiGreen  
284 expression upon varying ABA induction (y-axis) and GA induction (x-axis). Data were collected  
285 on Day 6 after addition of ABA, and on Day 3 after addition of GA. e) Quantification of  
286 mAzamiGreen at steady state as a function of GA (x-axis) and ABA (shades of red). Error bars  
287 represent the Standard Error (SE) of  $n=2$  independent replicates.

288 **Figure 2: TuNR confers independent control of population mean and variance in**  
289 **transgene expression.** a) Simplified diagram of TuNR shown in Figure 1A, with the addition of  
290 pTRE driving expression of tagBFP in the same cell to decompose intrinsic and extrinsic noise.  
291 b) Example of scatter plot of tagBFP and mAzamiGreen expression from TuNR induced with  
292 4.94  $\mu\text{M}$  ABA and 0  $\mu\text{M}$  GA . Decomposition identifies two major axes of variance: intrinsic  
293 variance, which is the spread of points perpendicular to the diagonal; and extrinsic variance,  
294 represented by the spread of points along the diagonal. c) Plot of intrinsic (red), extrinsic (blue)

295 and total (green) noise, quantified using the coefficient of variation or  $CV^2$ , versus mean  
296 expression of mAzamiGreen of TuNR-containing cells exposed to different combinations of ABA  
297 and GA. d) Representative distributions of mAzamiGreen expression for different combinations  
298 of inducer molecules, as identified in Panel C (i, ii, iii, and iv), that achieve the same mean  
299 expression from one of two independent experiments. e) Images of mRuby expression and  
300 pseudo-colored mAzamiGreen expression corresponding to cells from the populations shown in  
301 Panel D, isomean IV.

302 **Figure 3: TuNR enables orthogonal control of population mean and variance of**  
303 **endogenous genes.** a) Simplified diagram of TuNR, as shown in Figure 1A, driving the  
304 expression of *NGFR* and b) *CXCR4* from their endogenous loci. c) Distributions of *NGFR*  
305 expression for no induction (orange) and max induction (purple) of TuNR. Also shown is the  
306 *NGFR* distribution in the parental cell line (green). d) Distributions of *CXCR4* expression for no  
307 induction (orange) and full induction (purple) of TuNR. Also shown is the *CXCR4* distribution in  
308 the parental cell line (green). e) Coefficient of variation of endogenous *NGFR*, as a function of  
309 mean expression, following the activation of TuNR for 6 days. f) Coefficient of variation of  
310 endogenous *CXCR4* as a function of its mean expression, following the activation of the TuNR  
311 for 6 days. g, i) Representative distributions of *NGFR* for different TuNR induction levels that  
312 achieve the same mean (isomean) but different variability as identified by grey strips in Panel E.  
313 h, j) Representative distributions of *CXCR4* for different TuNR induction levels that achieve the  
314 same mean (isomean) but different expression variability, as identified by grey strips in Panel F.

## 315 Supplemental Figure Captions

316 Supplementary Figure 1: **TuNR nodes are orthogonal and circuit has low basal expression**

317 **of terminal output.** a) Full circuit diagram of TuNR targeted towards a pTRE promoter driving

318 mAzamiGreen expression. b) Distributions of mRuby expression on day 3 with increasing doses

319 of ABA (shades of red). Data are taken at day 3 when the means have reached steady-state

320 (Figure 1B in the main text). c) Distributions of the expression of mAzamiGreen representing the

321 abundance of dCas9 with (red) and without (beige) full induction of ABA. d) mRuby expression

322 plotted as a function of ABA concentration with increasing amounts of GA (concentration

323 increasing with shade of green). These are the same data as shown in Figure 1E in the main

324 text. Error bars represent the SE of n=2 independent replicates.

325 Supplementary Figure 2: **First node of TuNR is responsive only to ABA, and second node**

326 **is responsive to both ABA and GA.** a) Heatmap of steady-state mRuby expression in

327 response to the activation of the first node of TuNR with increasing ABA concentration (y-axis),

328 and increasing GA (x-axis). b) Heatmaps of steady-state mAzamiGreen (left) and tagBFP (right)

329 expression with increasing ABA (y-axis), and increasing GA (x-axis).

330 Supplementary Figure 3: **Correlated expression of terminal outputs mAzamiGreen and**

331 **tagBFP across 96 combinations of ABA and GA.** a) Representative scatter plots of tagBFP

332 and mAzamiGreen expression from TuNR induced with 96 combinations of ABA and GA.

333 Supplementary Figure 4: **TuNR achieves several isomean combinations of inducers with**

334 **different variability.** a) Heatmap of mean and b) CV<sup>2</sup> of mAzamiGreen expression. c) Example

335 mAzamiGreen distributions binned by the same mean expression. d) Heatmap of mean and e)

336  $CV^2$  of tagBFP expression. f) Example tagBFP distributions binned by the same mean  
337 expression.

338 Supplementary Figure 5: **Mean expression and  $CV^2$  from terminal nodes mAzamiGreen and**  
339 **tagBFP are strongly correlated across independent replicates and independent clones.** a)  
340 All-by-all plot of mean expression by well between mAzamiGreen and tagBFP, and across  
341 independent replicates and different clones of TuNR. R, Pearson Correlation Coefficient. b)  
342 All-by-all plot of well  $CV^2$  between mAzamiGreen and tagBFP, and across independent  
343 replicates and different clones of TuNR.

344 Supplementary Figure 6: **TuNR “chassis” clonal cell lines reach steady state with**  
345 **comparable on-kinetics to previous TuNR cell lines.** a) Time-dependent mRuby expression  
346 of three independent clones, E11 (left), F5 (center), F11 (right) induced with increasing  
347 concentrations of ABA (shades of red). Error bars represent the 95% Confidence Interval of the  
348 mean. b) Clone F11 distributions of mRuby expression at steady-state (after 3 days) per dosage  
349 of ABA (shades of red). c) Heatmap of the mean expression of *NGFR* and d) *CXCR4* in the  
350 clone F11 background.

351 Supplementary Figure 7: **Trends of TuNR-mediated mean and variability control are**  
352 **maintained across independent replicates.** a) Plot of the 96 combinations of ABA and GA  
353 population mean expression of *NGFR* and b) *CXCR4* between independent replicates. R,  
354 Pearson Correlation Coefficient. c) Plot of the corresponding  $CV^2$  for the same 96 combinations  
355 of ABA and GA for *NGFR* and d) *CXCR4* independent replicates.



## 356 **Materials and Methods**

### 357 **Plasmid Construction**

358 Plasmids were constructed using a hierarchical DNA assembly method as described  
359 previously<sup>47,48</sup>. All proteins had internal BsaI and BsmBI restriction sites removed prior to  
360 cloning. Proteins were introduced into the cloning system either by PCR or gene block (IDT),  
361 and were then assembled into transcriptional units. Transcriptional units were then assembled  
362 into final multi-transcriptional unit (multi-TU) destination vectors to facilitate delivery to cells as  
363 described in the main text. To increase efficiency of integration, TuNR construct was split into  
364 two plasmids encoding full circuit. A third plasmid encoded pTRE driving mAzamiGreen and  
365 tagBFP, along with a mu6 cassette expressing a gRNA targeted to the pTRE promoter. All  
366 plasmids and cell lines will be available at Addgene, or upon request to the corresponding  
367 author.

### 368 **Bacterial Cell Culture**

369 Commercial MachI and XL10 strains (QB3 MacroLab) were used to transform plasmid vectors.  
370 A typical transformation mixture consists of 2  $\mu$ L of the Golden Gate reaction product, 48  $\mu$ L  
371 bacteria, incubated on ice for 30 minutes, heat shocked at 42 °C for 1 minute, recovered on ice  
372 for 5 minutes, reaction mixture plated onto selective agar and incubated overnight at 37 °C. In  
373 the case of multi-TU transformations, cells recovered in LB media for 30 min after heat shock at  
374 37°C before plating reaction onto kanamycin selective agar plates. Cells were cultured in  
375 antibiotic concentrations of 100  $\mu$ g/mL chloramphenicol (part domestication), 25  $\mu$ g/mL  
376 carbenicillin (transcriptional unit) and 100  $\mu$ g/mL kanamycin (multi-TU).

### 377 **Mammalian Cell Culture**

378 PC9 cells were maintained in RPMI media (Thermo) supplemented with 10% fetal bovine serum  
379 (UCSF Cell Culture Facility), 1% Glutamine (Gibco) and 1% Anti-Anti (Gibco). Cells were  
380 passaged every other day and maintained at 37 °C with 5% CO<sub>2</sub>. For flow cytometry, cells were  
381 seeded at 1,500 cells/well in a 96-well flat-bottom plate (Corning) and allowed to adhere  
382 overnight. Cells were induced with ABA, and fresh media with ABA drug was replenished every  
383 24 hours for 3 days. After 72 hours of ABA induction upon which steady-state has been  
384 reached, cells were induced with ABA and GA for 3 additional days.

### 385 **Cell Line Generation**

386 Cell lines used in Figures 1 and 2 were generated by co-transfecting parts one, two and three of  
387 the TuNR circuit in equimolar amounts in addition to PiggyBac Transposase (pCMV-hyPBase)  
388 using Lipofectamine 3000 (Thermo) according to manufacturer's instructions. TuNR "chassis"  
389 cell lines were generated as described above except by omitting part 3. All cell lines were  
390 clonally expanded from a single cell and verified to express circuit components by fluorophore  
391 proxy.

### 392 **Lentiviral Production**

393 Lentivirus particles were generated as described previously<sup>47</sup>. In short, LX-HEK293T cells were  
394 seeded at approximately 50% confluency in a 6-well plate, and the following day were  
395 transfected with lentiviral vector of interest alongside packaging plasmids (pCMV-dR8.91 and  
396 pCMV-VSV-G) using Lipofectamine 3000 (Thermo) according to manufacturer's instructions.  
397 After 72 hours, the supernatant was filtered through a 0.45 µm filter and added to PC9 cells in  
398 standard growth media supplemented with 4 µg/mL of polybrene (SCBT sc-134220) and  
399 centrifuged at 800 x g for 30 minutes. After 24 hours, media was exchanged for fresh media and  
400 assessed for selective marker expression after 72 hours.

### 401 **Flow Cytometry**

402 Flow cytometry was performed using a LSR Fortessa (BD) with a four laser configuration (488  
403 nm, 635 nm, 355 nm, 405 nm). mAzamiGreen (excitation at 488 nm, emission at 530 nm),  
404 mRuby (excitation at 561 nm, emission between 610 and 620 nm), tagBFP (excitation at 355  
405 nm, emission at 450 nm) and iRFP713 (excitation at 690 nm, emission at 713 nm) fluorescence  
406 levels were recorded for at least 10,000 events. To isolate single cell clones, cultures were fully  
407 induced with ABA and GA and single cells were isolated using a FACS Aria II (BD) into a  
408 96-well flat-bottom plate based upon iRFP713, mRuby, and mAzamiGreen expression. Clonal  
409 cells were again screened for fluorescence activation after three weeks. For all experiments,  
410 cells were gated based on iRFP713 expression (presence of circuit).

#### 411 **Microscopy**

412 Images were collected on a Nikon Ti Inverted Widefield Epifluorescence microscope with a  
413 mercury lamp to illuminate mAzamiGreen (excitation at 488 nm, emission at 530 nm) and  
414 mRuby (excitation at 561 nm, emission between 610 and 620 nm). Imaging was performed in a  
415 temperature and atmosphere controlled chamber collected through a 10x air objective with a  
416 200 ms exposure time. Image histograms were normalized and pseudo-colored in Fiji (ImageJ).

#### 417 **Drug Compounds**

418 Abscisic Acid (Sigma) and Gibberellic Acid (Santa Cruz Biotechnology) were prepared as  
419 individual 4000x stocks (1.6 M and 20 mM, respectively) and used to generate 96-well plates of  
420 mixed stock plates described below.

#### 421 **Drug stock preparation**

422 Using an automated liquid handler (Labcyte Echo), drug stocks were prepared as 96-well plates  
423 (BioRad) at stock concentrations used for replicate experiments. Stock volumes were held  
424 constant with DMSO, and plates were stored at -20 °C.

#### 425 **Immunostaining**

426 Cells were dissociated non-enzymatically using Versene Solution (Gibco™) at 37 °C for 20 min.  
427 The cells were then quenched in media and resuspended with wash buffer (10% FBS in DPBS)  
428 and transferred to a V-bottom 96-well plate. The cells were pelleted by centrifugation at 400 xg  
429 for 4 min. The plate was rapidly decanted and resuspended with 50 µL of corresponding  
430 antibody (1:400 in wash buffer) and incubated at room temperature in the dark for 1 hour. The  
431 cells were then washed with 100 µL of wash buffer and resuspended in 100 µL of wash buffer  
432 for immediate analysis by flow cytometry. Antibodies were purchased from ThermoFisher  
433 (CXCR4: #53-9991-80; NGFR: #PA5-20162). CXCR4 antibody and isotype were used at 1.25  
434 µg/mL, and NGFR antibody and isotype were used at 1.25 µg/mL.

#### 435 **Data Processing and Statistical Analysis**

436 Statistical and data analysis was executed using custom-written Python scripts.

#### 437 **Data Availability**

438 All source data and code is available at <https://github.com/arb5134/Rheostat>.

#### 439 **Competing Interests**

440 The authors declare no competing interests.

## 441 **Author Contributions**

442 A.R.B., J.P.F., H.E.-S. conceived of the study. A.R.B., J.P.F., J.E.P. designed and performed all  
443 experiments, and collected data. All authors interpreted the results and wrote the manuscript.

## 444 **Acknowledgements**

445 The authors thank members of the El-Samad lab for helpful guidance, feedback and discussion.  
446 The authors also thank Jason Town (UCSF), Ricardo Almeida (UCSF), Xiaoxiao (Vany) Sun  
447 (UCSF), Qiu Chang Wu (Harvard) and Zoë Steier (UC Berkeley) for early assistance and  
448 discussions. We thank the Steven Altschuler and Lani Wu labs for the gift of parental PC9 cells  
449 and the Wendell Lim lab for LX-HEK293T cells. H.E-.S is an investigator in the Chan  
450 Zuckerberg Biohub and this work was supported by the CZ-Biohub gift. This work was also  
451 supported by the National Science Foundation grant DBI-1548297 and National Science  
452 Foundation through grant NSF-MCB 1715108 awarded to H.E-.S, and the National Defense  
453 Science & Engineering Graduate (NDSEG) Fellowship awarded to A.R.B.

## 454 References

- 455 1. Charlebois, D. A., Abdennur, N. & Kaern, M. Gene expression noise facilitates adaptation  
456 and drug resistance independently of mutation. *Phys. Rev. Lett.* **107**, 218101 (2011).
- 457 2. Beaumont, H. J. E., Gallie, J., Kost, C., Ferguson, G. C. & Rainey, P. B. Experimental  
458 evolution of bet hedging. *Nature* **462**, 90–93 (2009).
- 459 3. Chang, A. Y. & Marshall, W. F. Dynamics of living cells in a cytomorphological state space.  
460 doi:10.1101/549246.
- 461 4. Spencer, S. L., Gaudet, S., Albeck, J. G., Burke, J. M. & Sorger, P. K. Non-genetic origins of  
462 cell-to-cell variability in TRAIL-induced apoptosis. *Nature* **459**, 428–432 (2009).
- 463 5. Weinberger, L. S., Burnett, J. C., Toettcher, J. E., Arkin, A. P. & Schaffer, D. V. Stochastic  
464 Gene Expression in a Lentiviral Positive-Feedback Loop: HIV-1 Tat Fluctuations Drive  
465 Phenotypic Diversity. *Cell* vol. 122 169–182 (2005).

- 466 6. Huh, D. & Paulsson, J. Random partitioning of molecules at cell division. *Proc. Natl. Acad. Sci. U. S. A.* **108**, 15004–15009 (2011).
- 467
- 468 7. Handly, L. N., Pilko, A. & Wollman, R. Paracrine communication maximizes cellular  
469 response fidelity in wound signaling. *Elife* **4**, e09652 (2015).
- 470 8. Elowitz, M. B., Levine, A. J., Siggia, E. D. & Swain, P. S. Stochastic gene expression in a  
471 single cell. *Science* **297**, 1183–1186 (2002).
- 472 9. Ebadi, H. *et al.* Patterning the insect eye: From stochastic to deterministic mechanisms.  
473 *PLoS Comput. Biol.* **14**, e1006363 (2018).
- 474 10. Blake, W. J., Kærn, M., Cantor, C. R. & Collins, J. J. Noise in eukaryotic gene expression.  
475 *Nature* vol. 422 633–637 (2003).
- 476 11. Eisenberg, E. & Levanon, E. Y. Human housekeeping genes, revisited. *Trends Genet.* **29**,  
477 569–574 (2013).
- 478 12. Balaban, N. Q., Merrin, J., Chait, R., Kowalik, L. & Leibler, S. Bacterial persistence as a  
479 phenotypic switch. *Science* **305**, 1622–1625 (2004).
- 480 13. Chang, H. H., Hemberg, M., Barahona, M., Ingber, D. E. & Huang, S. Transcriptome-wide  
481 noise controls lineage choice in mammalian progenitor cells. *Nature* **453**, 544–547 (2008).
- 482 14. Carey, J. N. *et al.* Regulated Stochasticity in a Bacterial Signaling Network Permits  
483 Tolerance to a Rapid Environmental Change. *Cell* **175**, 1989–1990 (2018).
- 484 15. Zhang, Z., Qian, W. & Zhang, J. Positive selection for elevated gene expression noise in  
485 yeast. *Mol. Syst. Biol.* **5**, 299 (2009).
- 486 16. Schmiedel, J. M., Carey, L. B. & Lehner, B. Empirical mean-noise fitness landscapes reveal  
487 the fitness impact of gene expression noise. *Nature Communications* vol. 10 (2019).
- 488 17. Blake, W. J. *et al.* Phenotypic consequences of promoter-mediated transcriptional noise.  
489 *Mol. Cell* **24**, 853–865 (2006).

- 490 18. Lehner, B. Selection to minimise noise in living systems and its implications for the  
491 evolution of gene expression. *Mol. Syst. Biol.* **4**, 170 (2008).
- 492 19. Dar, R. D., Hosmane, N. N., Arkin, M. R., Siliciano, R. F. & Weinberger, L. S. Screening for  
493 noise in gene expression identifies drug synergies. *Science* **344**, 1392–1396 (2014).
- 494 20. Farquhar, K. S. *et al.* Role of network-mediated stochasticity in mammalian drug resistance.  
495 *Nat. Commun.* **10**, 2766 (2019).
- 496 21. Shaffer, S. M. *et al.* Rare cell variability and drug-induced reprogramming as a mode of  
497 cancer drug resistance. *Nature* **546**, 431–435 (2017).
- 498 22. Murphy, K. F., Adams, R. M., Wang, X., Balázsi, G. & Collins, J. J. Tuning and controlling  
499 gene expression noise in synthetic gene networks. *Nucleic Acids Res.* **38**, 2712–2726  
500 (2010).
- 501 23. Nevozhay, D., Adams, R. M., Murphy, K. F., Josic, K. & Balázsi, G. Negative autoregulation  
502 linearizes the dose-response and suppresses the heterogeneity of gene expression. *Proc.*  
503 *Natl. Acad. Sci. U. S. A.* **106**, 5123–5128 (2009).
- 504 24. Gao, X. J., Chong, L. S., Kim, M. S. & Elowitz, M. B. Programmable protein circuits in living  
505 cells. *Science* **361**, 1252–1258 (2018).
- 506 25. Roybal, K. T. *et al.* Engineering T Cells with Customized Therapeutic Response Programs  
507 Using Synthetic Notch Receptors. *Cell* **167**, 419–432.e16 (2016).
- 508 26. Morsut, L. *et al.* Engineering Customized Cell Sensing and Response Behaviors Using  
509 Synthetic Notch Receptors. *Cell* **164**, 780–791 (2016).
- 510 27. Guinn, M. T. & Balázsi, G. Noise-reducing optogenetic negative-feedback gene circuits in  
511 human cells. *Nucleic Acids Res.* (2019) doi:10.1093/nar/gkz556.
- 512 28. Benzinger, D. & Khammash, M. Pulsatile inputs achieve tunable attenuation of gene  
513 expression variability and graded multi-gene regulation. *Nat. Commun.* **9**, 3521 (2018).

- 514 29. Mundt, M., Anders, A., Murray, S. M. & Sourjik, V. A System for Gene Expression Noise  
515 Control in Yeast. *ACS Synth. Biol.* **7**, 2618–2626 (2018).
- 516 30. Pedone, E. *et al.* A tunable dual-input system for on-demand dynamic gene expression  
517 regulation. *Nat. Commun.* **10**, 4481 (2019).
- 518 31. Michaels, Y. S. *et al.* Precise tuning of gene expression levels in mammalian cells. *Nat.*  
519 *Commun.* **10**, 818 (2019).
- 520 32. Aranda-Díaz, A., Mace, K., Zuleta, I., Harrigan, P. & El-Samad, H. Robust Synthetic Circuits  
521 for Two-Dimensional Control of Gene Expression in Yeast. *ACS Synth. Biol.* **6**, 545–554  
522 (2017).
- 523 33. Gao, Y. *et al.* Complex transcriptional modulation with orthogonal and inducible dCas9  
524 regulators. *Nat. Methods* **13**, 1043–1049 (2016).
- 525 34. Liang, F.-S., Ho, W. Q. & Crabtree, G. R. Engineering the ABA plant stress pathway for  
526 regulation of induced proximity. *Sci. Signal.* **4**, rs2 (2011).
- 527 35. Miyamoto, T. *et al.* Rapid and orthogonal logic gating with a gibberellin-induced dimerization  
528 system. *Nat. Chem. Biol.* **8**, 465–470 (2012).
- 529 36. Baim, S. B., Labow, M. A., Levine, A. J. & Shenk, T. A chimeric mammalian transactivator  
530 based on the lac repressor that is regulated by temperature and isopropyl  
531 beta-D-thiogalactopyranoside. *Proc. Natl. Acad. Sci. U. S. A.* **88**, 5072–5076 (1991).
- 532 37. Chen, Y. *et al.* Tuning the dynamic range of bacterial promoters regulated by  
533 ligand-inducible transcription factors. *Nat. Commun.* **9**, 64 (2018).
- 534 38. Louvion, J. F., Havaux-Copf, B. & Picard, D. Fusion of GAL4-VP16 to a steroid-binding  
535 domain provides a tool for gratuitous induction of galactose-responsive genes in yeast.  
536 *Gene* **131**, 129–134 (1993).
- 537 39. Gossen, M. & Bujard, H. Tight control of gene expression in mammalian cells by



- 538 tetracycline-responsive promoters. *Proc. Natl. Acad. Sci. U. S. A.* **89**, 5547–5551 (1992).
- 539 40. Gossen, M. *et al.* Transcriptional activation by tetracyclines in mammalian cells. *Science*  
540 vol. 268 1766–1769 (1995).
- 541 41. Swain, P. S., Elowitz, M. B. & Siggia, E. D. Intrinsic and extrinsic contributions to  
542 stochasticity in gene expression. *Proc. Natl. Acad. Sci. U. S. A.* **99**, 12795–12800 (2002).
- 543 42. Müller, A. *et al.* Involvement of chemokine receptors in breast cancer metastasis. *Nature*  
544 vol. 410 50–56 (2001).
- 545 43. Liang, T., Wang, B., Li, J. & Liu, Y. LINC00922 Accelerates the Proliferation, Migration and  
546 Invasion of Lung Cancer Via the miRNA-204/CXCR4 Axis. *Med. Sci. Monit.* **25**, 5075–5086  
547 (2019).
- 548 44. Horlbeck, M. A. *et al.* Compact and highly active next-generation libraries for  
549 CRISPR-mediated gene repression and activation. *Elife* **5**, (2016).
- 550 45. Zalatan, J. G. *et al.* Engineering complex synthetic transcriptional programs with CRISPR  
551 RNA scaffolds. *Cell* **160**, 339–350 (2015).
- 552 46. Tanenbaum, M. E., Gilbert, L. A., Qi, L. S., Weissman, J. S. & Vale, R. D. A protein-tagging  
553 system for signal amplification in gene expression and fluorescence imaging. *Cell* **159**,  
554 635–646 (2014).
- 555 47. Fonseca, J. P. *et al.* A Toolkit for Rapid Modular Construction of Biological Circuits in  
556 Mammalian Cells. *ACS Synth. Biol.* **8**, 2593–2606 (2019).
- 557 48. Fonseca, J., Bonny, A., Town, J. & El-Samad, H. Assembly of Genetic Circuits with the  
558 Mammalian ToolKit. *BIO-PROTOCOL* vol. 10 (2020).

**A**

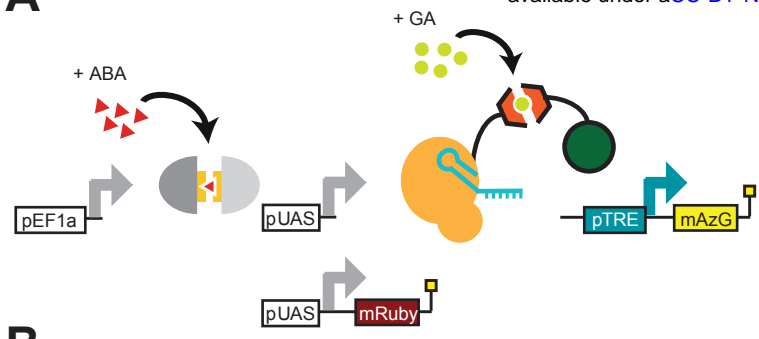

**B**

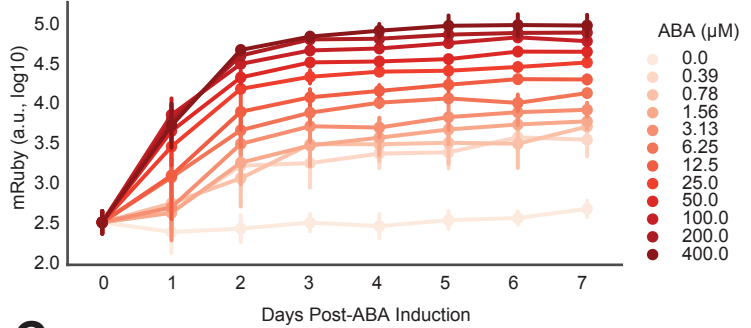

**C**

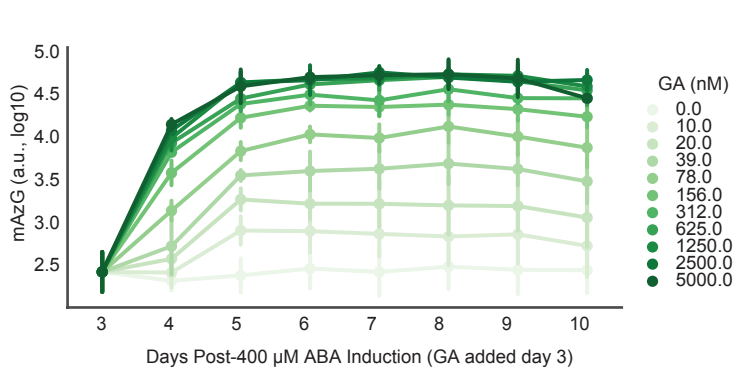

**D**

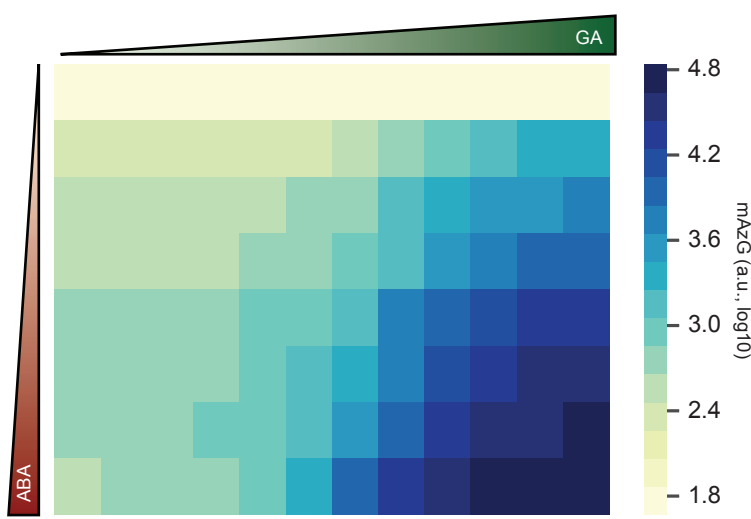

**E**

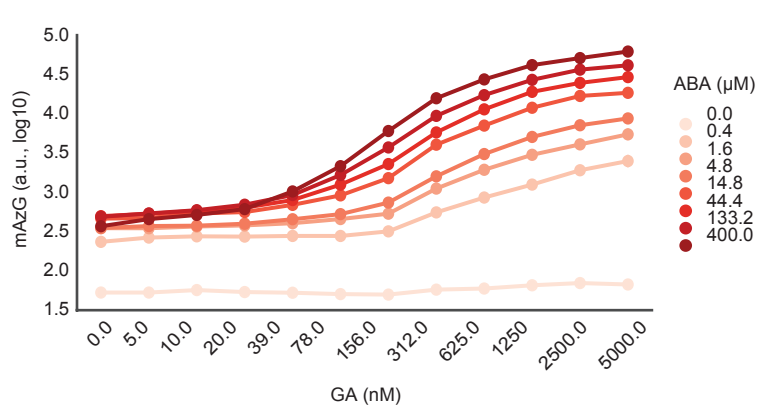

Figure 1

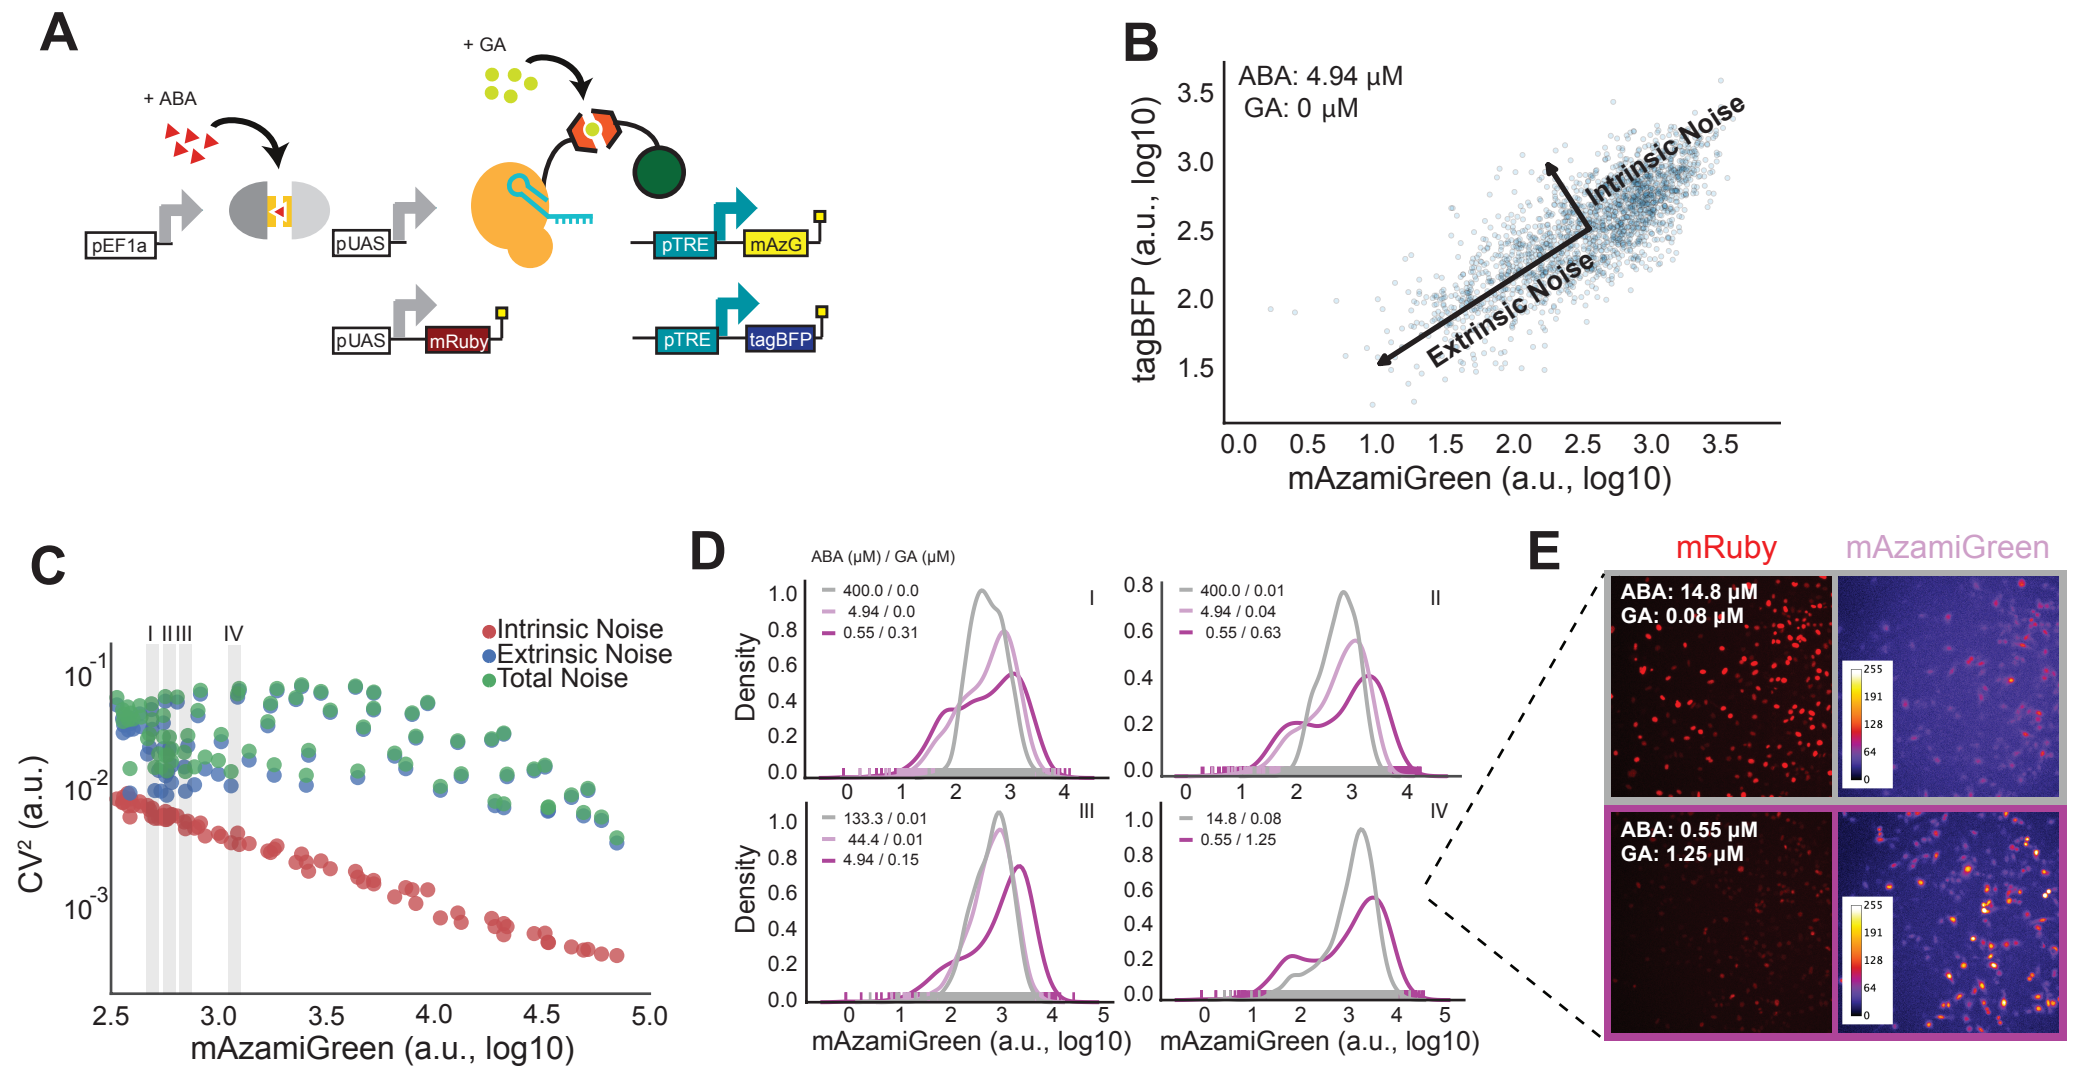

Figure 2

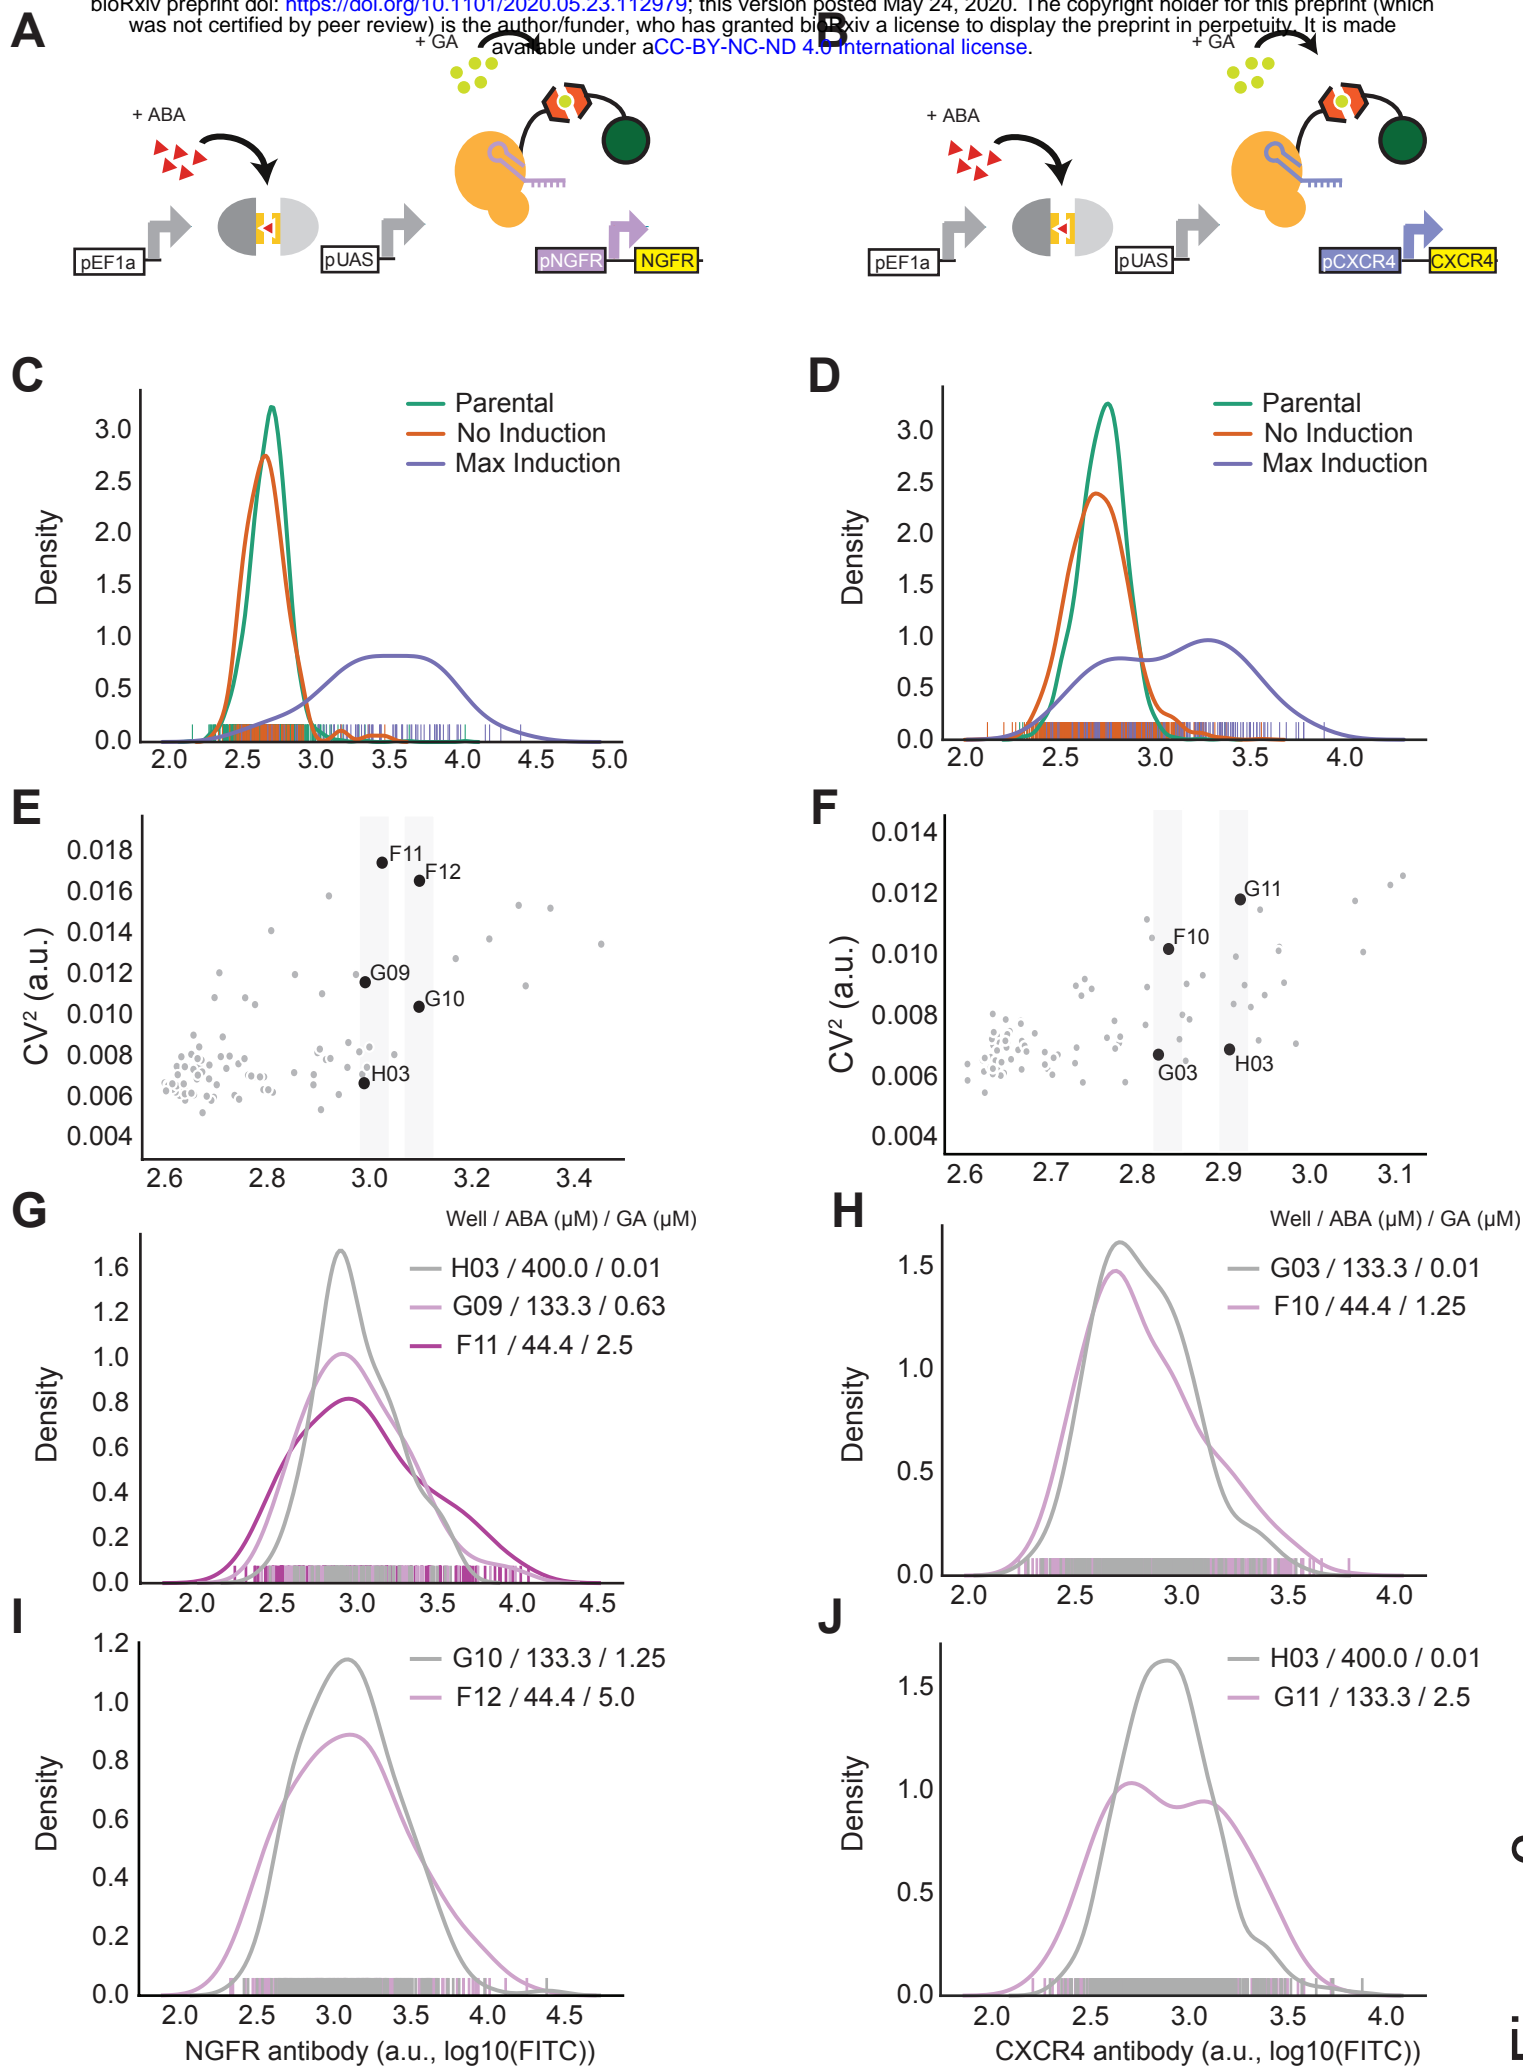

Figure 3
